# Supplementary material for: Design and synthesis of synthetic UP elements for modulation of gene expression in Escherichia coli
Source: PubMed Central journal article supplement — Synth Syst Biotechnol. 2019 May 2;4(2):99–106. doi: 10.1016/j.synbio.2019.04.002 (PMC6501063; doi:10.1016/j.synbio.2019.04.002), 2019-05-02
Supplement: mmc1.pdf [file mmc1.pdf]

## Supplementary Information

**Design and synthesis of synthetic UP elements for modulation of gene expression in**

**Escherichia coli**

Kristin V. Presnell<sup>1,3</sup>, Madeleine Flexer-Harrison<sup>2,3</sup>, and Hal S. Alper<sup>1,2,\*</sup>

<sup>1</sup> McKetta Department of Chemical Engineering  
The University of Texas at Austin  
200 E Dean Keeton St. Stop C0400  
Austin, Texas 78712

<sup>2</sup> Institute for Cellular and Molecular Biology  
The University of Texas at Austin  
2500 Speedway Avenue  
Austin, Texas 78712

<sup>3</sup>These authors contributed equally to this work

\*Corresponding author: Phone: (512) 471-4417, Fax: (512) 471-7060, E-mail:  
halper@che.utexas.edu

**Figure S1**

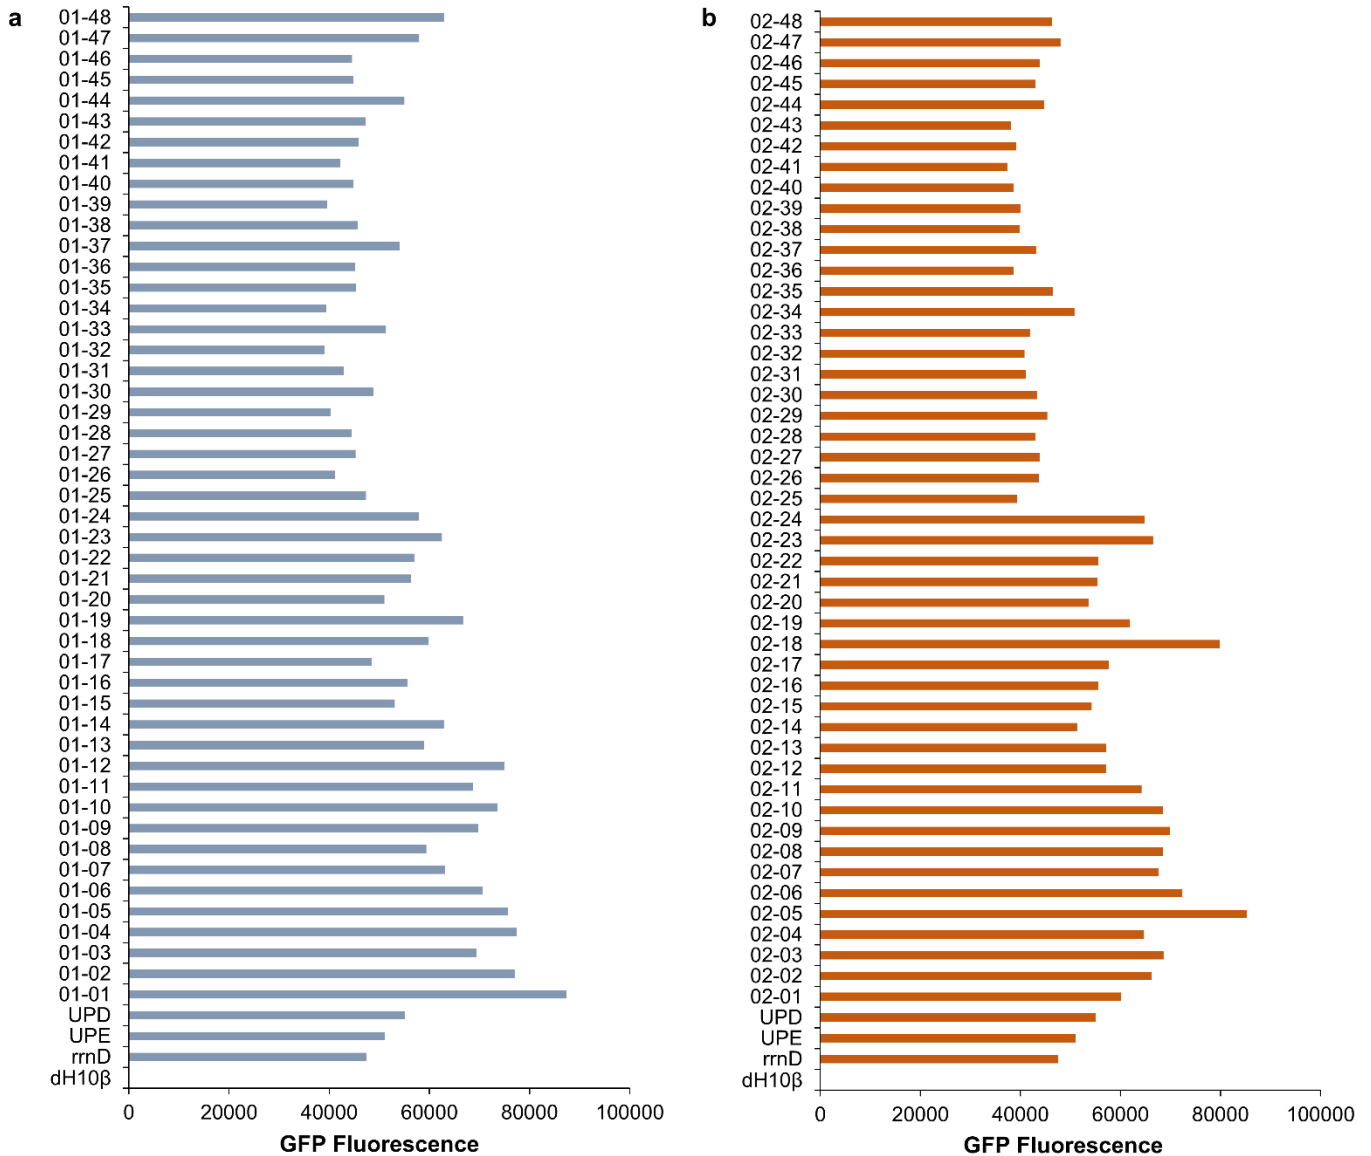

**Figure S1:** Final candidates from hexameric randomization libraries. Final 48 colonies picked from Library UPD-01 (**a**) and Library UPE-02 (**b**), after screening for top 10% of fluorescence with FACS, then **stationary phase** fluorescence measurement with flow cytometry. Library UPD-01 based on UPD sequence and Library UPE-02 based on UPE sequence. Positive controls UPD and UPE, and negative controls *rrnD* and untransformed dh10β in black.

## Figure S2

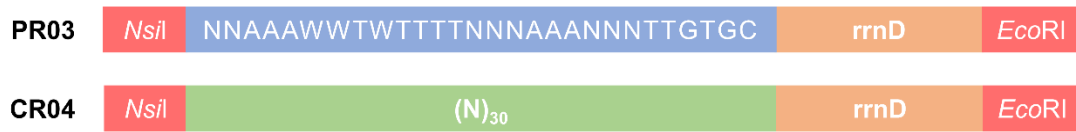

**Figure S2:** Design of partial and complete randomization libraries. To explore the potential sequence space of UP elements beyond that of UPD, two libraries were created based on partial randomization of an UP element consensus sequence previously identified (Estrem et al. 1999), and complete randomization of an extended UP element sequence space. These libraries were termed PR03 and CR04, respectively. W's signify A/T's

Figure S3

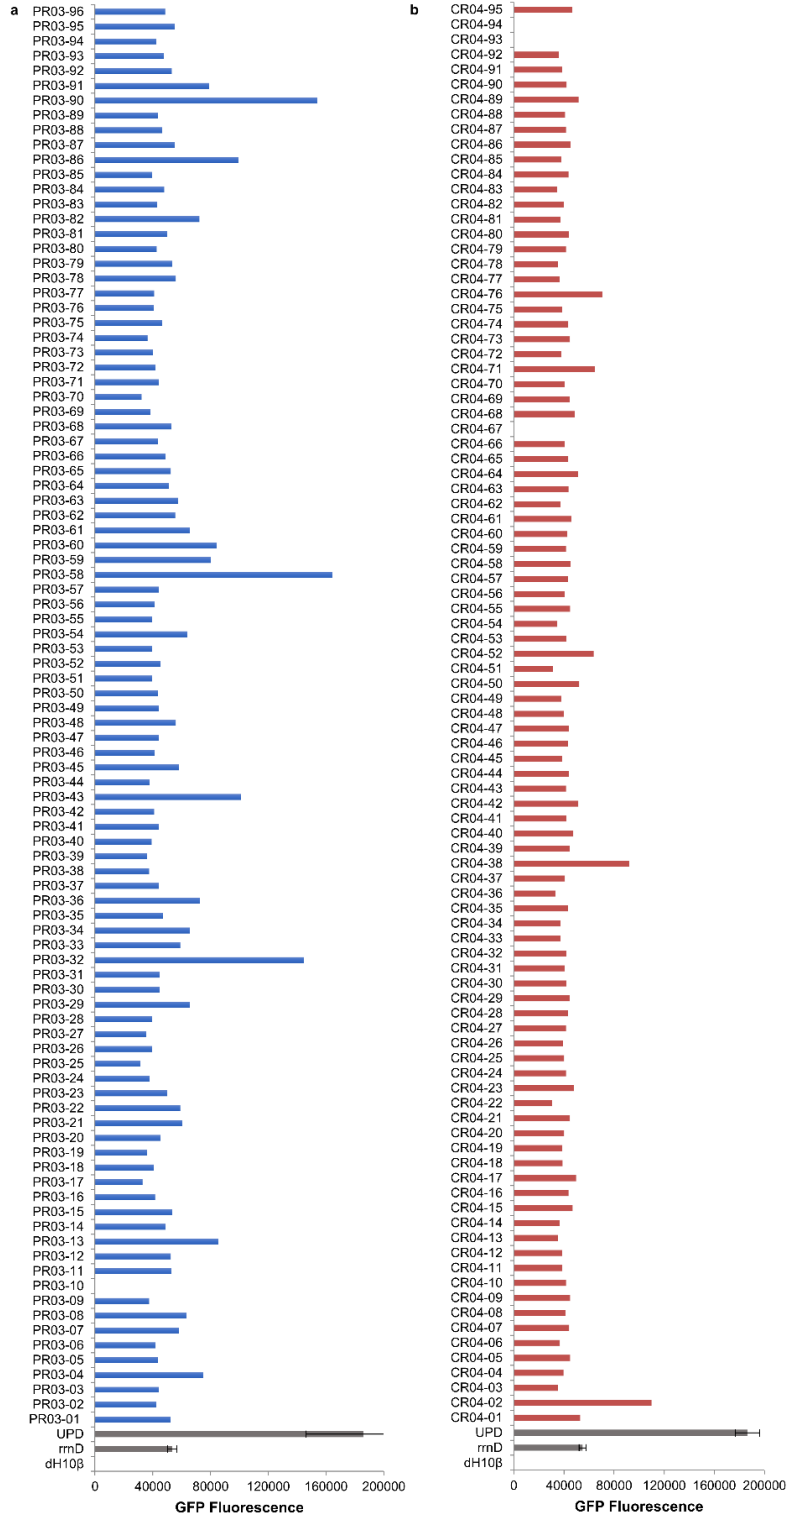

**Figure S3:** Performance of libraries PR03 and CR04. GFP fluorescence measurements of Library PR03 (**a**) and CR04 (**b**). Measurements made by flow cytometry in exponential phase. Positive control UPD and negative control untransformed dH10 $\beta$  shown in grey. Error bars represent standard deviation from technical triplicate.

Figure S4

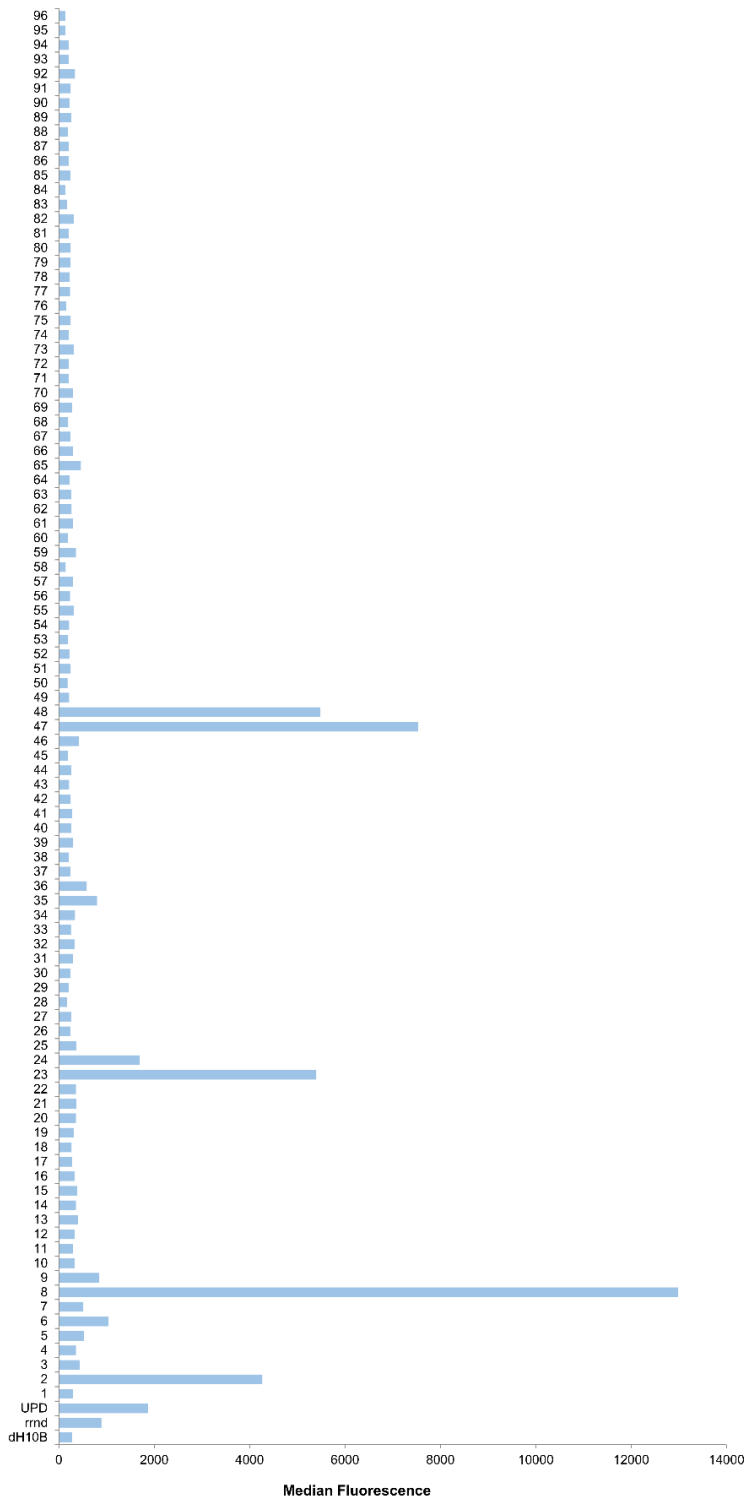

**Figure S4:** Comparison of stationary and exponential phase evaluation. Median fluorescence values of Library CR04 in stationary phase. Fluorescence values in stationary phase suffer from higher standard deviations and smaller percentages of cells exhibiting fluorescence within individual colonies when compared to exponential sort (**Fig. S3**).

Figure S5

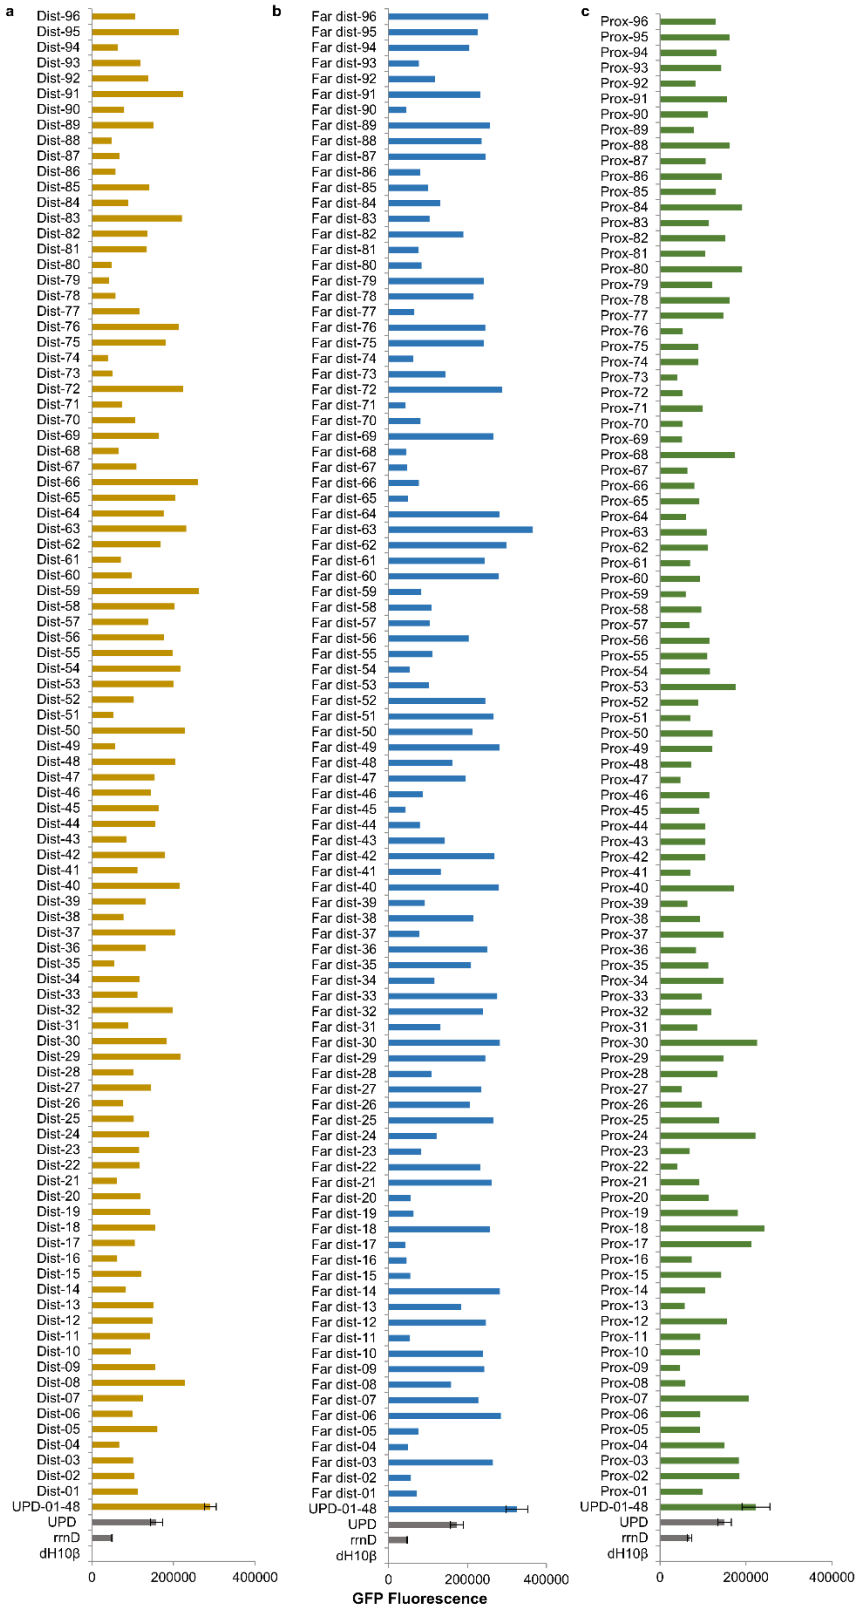



**Figure S5:** Performance of libraries based on partial randomization of UPD-01-48. GFP fluorescence measurements of Libraries UPD48-Dist (**a**), UPD48-Far dist (**b**), and UPD48-Prox (**c**). Measurements made by flow cytometry in exponential phase. Individual libraries evaluated on different days. Positive control UPD and negative control untransformed dH10 $\beta$  shown in grey. Error bars represent standard deviation from technical triplicate.

**Figure S6**

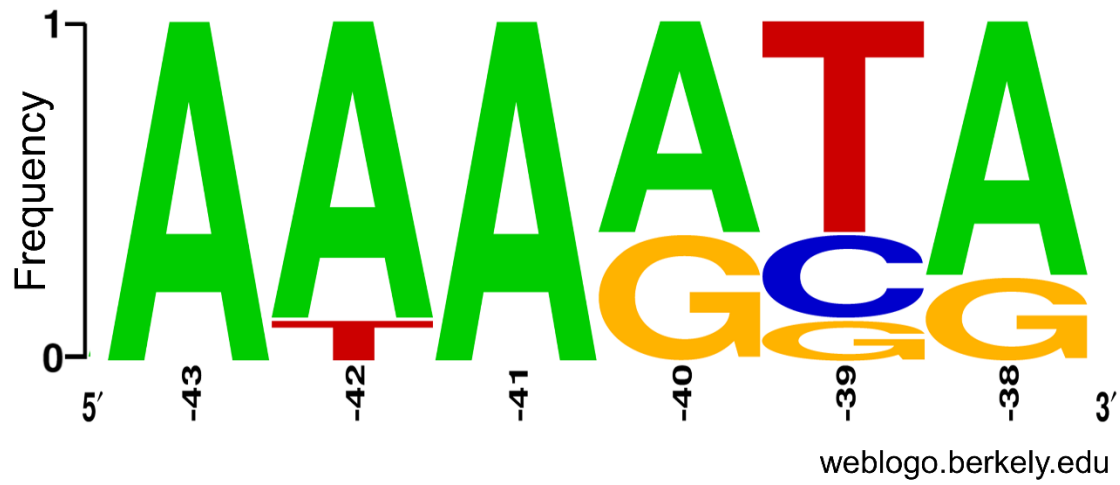

**Figure S6:** Sequence alignment between proximal regions previously reported by Estrem *et al.*

WebLogo y-axis represents relative nucleotide frequencies instead of bits.

**Figure S7**

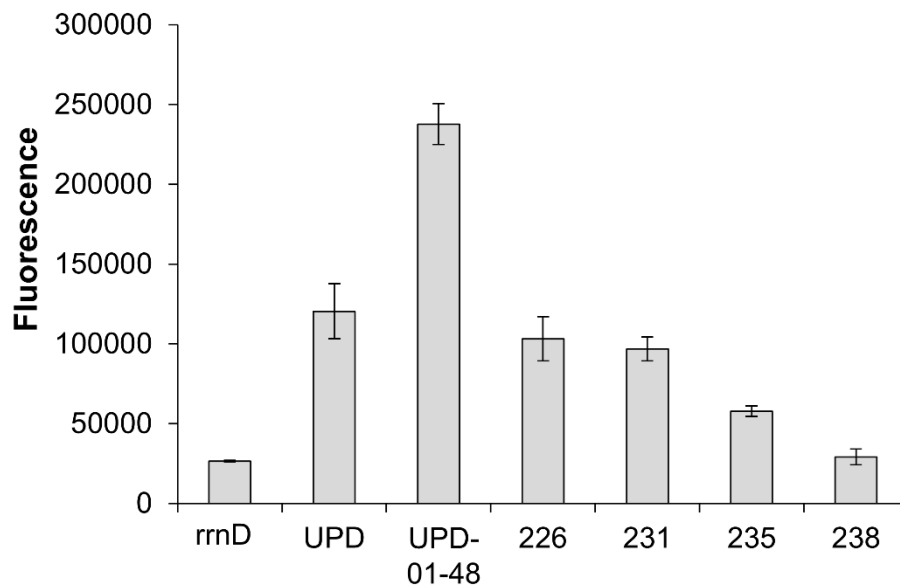

**Figure S7:** Performance of rationally designed tandem UP elements. GFP fluorescence measurements of rationally designed tandemly placed UP elements. Positive control UPD and negative controls *rrnD* and untransformed *dH10 $\beta$*  shown in grey. Error bars represent standard deviation of technical triplicates. Sequences shown in Table SV.

**Figure S8**

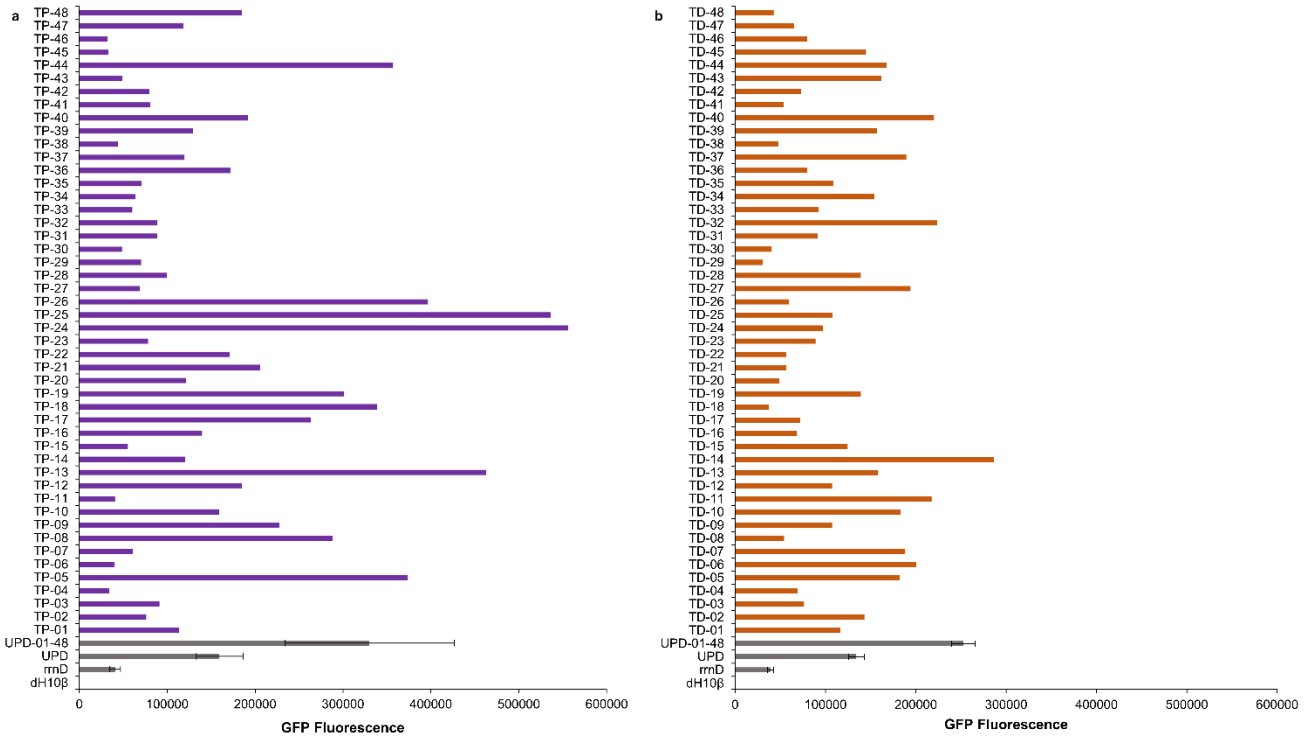

**Figure S8:** Tandem UP element libraries. GFP fluorescence of Tandem Proximal Library (**a**) and Tandem Distal Library (**b**), measured by flow cytometry. Positive control UPD and negative controls *rrnD* and untransformed *dh10β* shown in grey. Error bars represent standard deviation from technical triplicate.

**Figure S9**

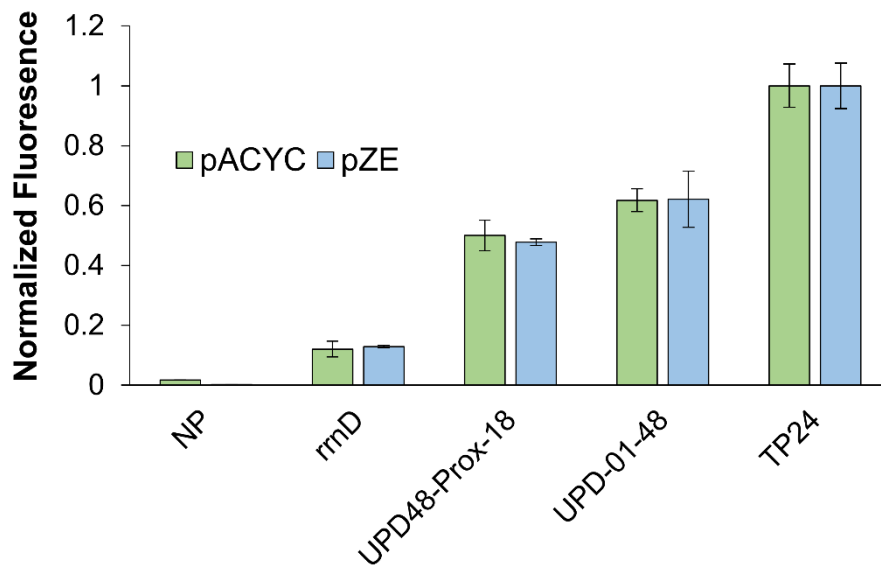

**Figure S9:** Normalized GFP fluorescence levels across variable plasmid backgrounds.

**Figure S10**

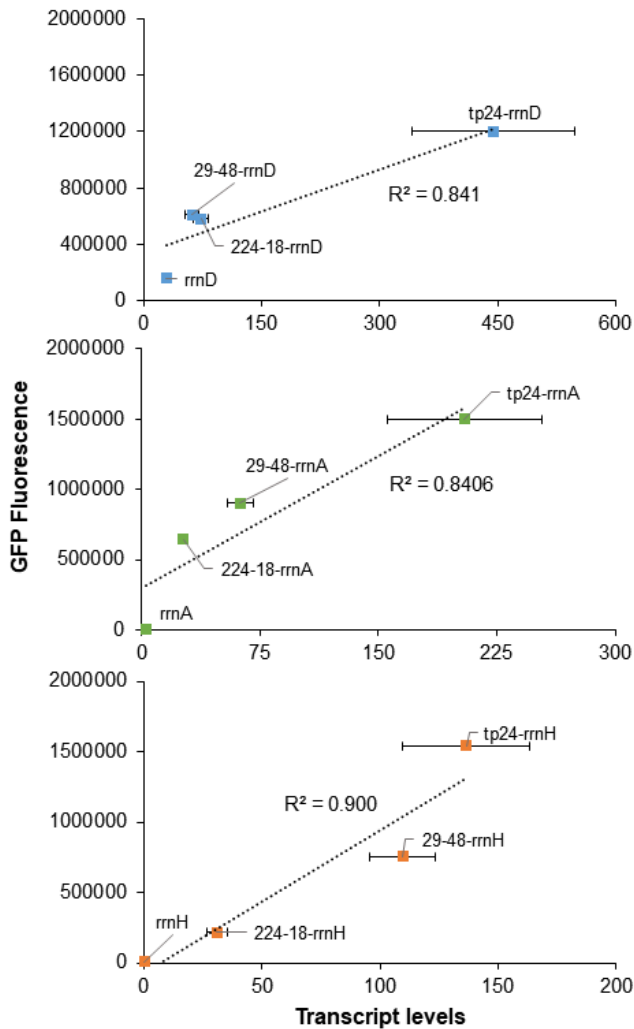

**Figure S10:** GFP fluorescence levels vs transcript levels for select UP elements upstream of variable rRNA cores. Top (blue): *rrmD* core promoters. Middle (green): *rrmA* core promoters. Bottom (orange): *rrmH* core promoters. Error bars represent standard deviation of technical triplicates. All transcript levels normalized to levels of no-promoter no-UP element pZE control. GFP fluorescence levels representative of the single biological sample from which the RNA was isolated.

**Table SI**

| Vector | Sequence                                                                                                                                                                                                                                                                                                                                                                                                                                                                                                                                                                                                                                                                                                                                                                                                                                                                                                                                                                                                                                                                                                                                                                                                                                                                                                                                                                                                                                                                                                                                                                                                                                                                                                                                                                                                                                                                                                                                                                                                                                                                                                                                                                                                                                                                                                                                                                                                                                                                                                                                                                                                                                                                                                                                                                                                                                                                                                                                                                                                                                                                                                                 |
|--------|--------------------------------------------------------------------------------------------------------------------------------------------------------------------------------------------------------------------------------------------------------------------------------------------------------------------------------------------------------------------------------------------------------------------------------------------------------------------------------------------------------------------------------------------------------------------------------------------------------------------------------------------------------------------------------------------------------------------------------------------------------------------------------------------------------------------------------------------------------------------------------------------------------------------------------------------------------------------------------------------------------------------------------------------------------------------------------------------------------------------------------------------------------------------------------------------------------------------------------------------------------------------------------------------------------------------------------------------------------------------------------------------------------------------------------------------------------------------------------------------------------------------------------------------------------------------------------------------------------------------------------------------------------------------------------------------------------------------------------------------------------------------------------------------------------------------------------------------------------------------------------------------------------------------------------------------------------------------------------------------------------------------------------------------------------------------------------------------------------------------------------------------------------------------------------------------------------------------------------------------------------------------------------------------------------------------------------------------------------------------------------------------------------------------------------------------------------------------------------------------------------------------------------------------------------------------------------------------------------------------------------------------------------------------------------------------------------------------------------------------------------------------------------------------------------------------------------------------------------------------------------------------------------------------------------------------------------------------------------------------------------------------------------------------------------------------------------------------------------------------------|
| pZE    | <p>ttctacggggtctgacgctcagtggaacgaaaactcacgtaagggttttggcatgactagtgttgattctaccaata<br/> aaaaacgcccggcggcaaccgagcgttctgaacaaatccagatggagttctgaggtcactactggatctatcaacaggag<br/> tccaagcgagctctcgaaccccagagtcccgtcagaagaactcgtcaagaaggcgatagaaggcgatgcgctgcgaa<br/> tcgggagcggcgataaccgtaaagcacgaggaagcggtcagcccattcgcgccaagctctcagcaatatcacgggta<br/> gccaacgetatgtcctgatagcggctccgccacaccagccggccacagtcgatgaatccagaaaageggcattttcca<br/> ccatgatattcggcaagcaggcctcggcagcagcagatcctcggcgtcgggcatgcgcgccttgagcctggc<br/> gaacagttcgggctggcgcgagcccctgatgctcttcgccagatcatcctgatcgacaagaccggcttccatccgagtac<br/> gtgctcgtcgtgatgcgatgttcgcttgggtgctgaatgggcaggtagccggatcaagcgtatgcagccgccgattgcat<br/> cagccatgatggatacttctcggcaggagcaaggtgagatgacaggagatcctgccccggcacttcgccaatagcag<br/> ccagtccttcccgttcagtgacaacgtcagcagctgcgcaaggaacgccgtcgtggccagccacgatagccg<br/> cgctgcctcgtcctgcagttcattcagggcaccggacaggtcggcttgacaaaaagaaccggcgcccctgcgtgac<br/> agccggaacacggcggcatcagagcagccgattgtctgttggccagtcataagcctcctccaccaagcgg<br/> ccggagaacctgcgtgcaatccatctgttcaatcatgcgaaacgatcctcatcctgtctctgatcagatctgatcccctgc<br/> gccatcagatccttggcggcaagaaagccatccagttactttcagggcttcccaaccttaccagagggcgccccagct<br/> ggcaattccatcgtatggcatgcatggaaaatTTTTTAAAAAATcgtgcttGTGCAAAAAATTGGGATCCCTATAATGCGCC<br/> TCGGGAATTCATAAAGAGGAGAAAGGTACCgcatgcgtaaaaggagaagaacttttactggagttgtcccaattctgtg<br/> aattagatggtgatgtaattgggcacaaatTTTctgctagtgagaggggtgaaggtgatgcaacatacggaaaacttaccctt<br/> aaatTTTtactgactactgaaaactacctgttccatggccaacactgtcactactttcggttatggtgttcaatgctttgcgag<br/> ataccagatcatatgaaacagcatgacttttcaagagtccatgcccgaaggtatgtacaggaagaactatattttcaa<br/> agatgacgggaactacaagacacgtgctgaagtcgaagttgaaggtgataccctgttaataagaatcagttaaaaggtatt<br/> gattttaagaagatggaacattcttgacacaaattggaatacaactataactcacacaatgatacatcatggcagacaa<br/> acaaaagaatggaatcaaagttactcAAAattagacacaacattgaagatggaagcgttcaactagcagaccattatcaa<br/> caaaatactccaattggcgtatggcctgtcctttaccagacaaccattacctgtccacacaatctgcccttcgaaagatcc<br/> caacgaaaagagagaccacatggctccttctgagttgtaacagctgctgggattacacatggcatggatgactatacaaaa<br/> ggcctgcagcaaacgacgaaaactacgctgcatcagtttaataagctgatcccatggtacgcgtgctagaggcatcaaat<br/> aaaacgaaaggctcagtcgaaagactggccttctgTTTTatctgttgttgcggtgacgctcctcctgagtaggacaaatc<br/> cgccgccctagacctagggcgttcggctgcggcagcgggtatcagctcactcaaggcggtaatacggttatccacaga<br/> atcaggggataacgcaggaagaacatgtgagcaaaaggccagcaaaaggccaggaaccgtaaaaaggccgCGGTTG<br/> CTGGCGTTTTCCATAGGCTCGCCCCCTGACGAGCATCAAAAAATCGACGCTCAAGTCAGAGGTGGCGAAACCCGAC<br/> AGGACTATAAAGATAACCAGGCGTTCCCCCTGGAAGCTCCCTGTCGCTCTCTGTTCCGACCTGCCGTTACC GGATAC<br/> CTGTCCGCTTTCTCCCTCGGGAAGCGTGGCGCTTTCTCATAGCTCACGCTGTAGGTATCTCAGTTCGGTGTAGGTCGTCG<br/> TCCAAGCTGGGCTGTGTGCACGAACCCCCGTTAGCCGACCGCTGCGCCTTATCCGGTAACATCGTCTGTAGTCCAAC<br/> CCGGTAAGACACGACTTATGCCACTGGCAGCAGCCACTGGTAACAGGATTAGCAGAGCGAGGTATGTAGGCGGTGCTA<br/> CAGAGTCTTGAAGTGGTGGCCTAACTACGGCTACACTAGAAGGACAGTATTTGGTATCTGCGCTCTGCTGAAGCCAGTTAC<br/> CTTCGGAAAAAGAGTTGGTAGCTCTGATCCGGCAACAACCACCCTGGTAGCGGTGTTTTTTGTTTGAAGCAGCAG<br/> ATTACGCGCAAAAAAAGGATCTCAAGAAGATCCTTTGATCT</p> |
| pACYC  | <p>tcctgttgataaccgggaagccctgggccaacttttggcgaaaatgagacgttgatcggcacgtaagaggttccaacttca<br/> ccataatgaaataagatcactaccggcgtatTTTTgagttatcagattttcaggagctaaggaagctaaaATGGAGAAAA<br/> AAACTACTGGATATACCAGTGTGATATATCCCAATGGCATCGTAAAGAACATTTGAGGCATTCAGTCAGTTGCTCAATGTA<br/> CCTATAACCAGACCGTTCAGCTGGATATTACGGCCTTTTAAAGACCGTAAAGAAAAATAAGCACAAAGTTTATCCGGCCTT<br/> TACACTCTTCCCGCTGATGAATGCTATCCGGAGTTCGATGGCAATGAAAGACGGTGAGCTGGTGTATGGGATAG<br/> TGTACCCCTGTACACCGTTTCCATGAGCAACTGAAACGTTTTCATCGCTCTGGAGTGAATACCACGACGATTTCCGGCA<br/> GTTTCTACACATATATCGAAGATGGCGGTGTTACGGTGAACCTGGCCTATTTCCCTAAAGGTTTATTGAGAATGTTTT</p>                                                                                                                                                                                                                                                                                                                                                                                                                                                                                                                                                                                                                                                                                                                                                                                                                                                                                                                                                                                                                                                                                                                                                                                                                                                                                                                                                                                                                                                                                                                                                                                                                                                                                                                                                                                                                                                                                                                                                                                                                                                                                                                                                                                                                                                                                                                                                                                                                                                                                                    |

|                                                                                                                                                                                                                                                                                                                                                                                                                                                                                                                                                                                                                                                                                                                                                                                                                                                                                                                                                                                                                                                                                                                                                                                                                                                                                                                                                                                                                                                                                                                                                                                                                                                                                                                                                                                                                                                                                                                                                                                                                                                                                                                                                                                                                                                                                                                                                                                                                                                                                                                                                                                                                                                                                                                                                                                                                                                                                                                                                                                                                                      |
|--------------------------------------------------------------------------------------------------------------------------------------------------------------------------------------------------------------------------------------------------------------------------------------------------------------------------------------------------------------------------------------------------------------------------------------------------------------------------------------------------------------------------------------------------------------------------------------------------------------------------------------------------------------------------------------------------------------------------------------------------------------------------------------------------------------------------------------------------------------------------------------------------------------------------------------------------------------------------------------------------------------------------------------------------------------------------------------------------------------------------------------------------------------------------------------------------------------------------------------------------------------------------------------------------------------------------------------------------------------------------------------------------------------------------------------------------------------------------------------------------------------------------------------------------------------------------------------------------------------------------------------------------------------------------------------------------------------------------------------------------------------------------------------------------------------------------------------------------------------------------------------------------------------------------------------------------------------------------------------------------------------------------------------------------------------------------------------------------------------------------------------------------------------------------------------------------------------------------------------------------------------------------------------------------------------------------------------------------------------------------------------------------------------------------------------------------------------------------------------------------------------------------------------------------------------------------------------------------------------------------------------------------------------------------------------------------------------------------------------------------------------------------------------------------------------------------------------------------------------------------------------------------------------------------------------------------------------------------------------------------------------------------------------|
| <p>tcgtctcagccaatccctgggtgagttcaccagttttgatttaaacgtggccaatatggacaacttcttcgccccgtttcac<br/> tatgggcaaatattatagcaaggcgacaaggtgctgatgccctggcgattcaggttcatcatgccgTtgtgatggcttc<br/> catgtcggcagaatgcttaatgaattacaacagctactgcgatgagtgccagggcggggcgtaatTTTTtaaggcagttattg<br/> gtgccctaaacgctggtgctacgctgaataagtataaagcggatgaatggcagaaattcgaaagcaaatcgacc<br/> cggtcggcgaaacgatcctcatctgtctcttgatcagatcttgatccccctgcgccatcagatccttggcggcaagaaagcc<br/> atccagtttactttgcagggctcccaacctaccagaggcgccccagctggcaattccatcgatggcatgcatggaaaat<br/> TTTTTtaaaaaatcgtgcttgcataaaattgggatccctataatgcgctcgggaattcattaaagaggagaaaggtacc<br/> gcatgcgtaaaggagaagaacttttactggagttgtcccaattctgttgaattagatgggtgatgtaattgggcacaaatttc<br/> tgcagtgagaggggtgaagggtgatgcaacatacggaaaacttaccttaatttttgcactactggaaaactacctgttc<br/> catggccaacacttgcactacttccggtatgggtgtcaatgctttgcgagataccagatcatatgaacagcatgactttt<br/> caagagtgccatgcccgaaggtatgtacaggaagaactatattttcaaagatgacgggaactacaagacacgtgctga<br/> agtcaagtttgaaggatgataccctgttaataagaatcagttaaaaggtattgatttaaagaagatggaacattcttgaca<br/> caaattggaatacaactataactcacacaatgtatacatatggcagacaacaaaagaatggaatcaagtaacttcaaa<br/> attagacacaacattgaagatggaagcgtcaactagcagaccattatcaacaaaactccaattggcgtgacctgtcc<br/> ttttaccagacaaccattacctgtccacacaatctgcccttccgaaagatcccaacgaaaagagagaccacatggctcttct<br/> gagtttgaacagctgctgggattacacatggcatggatgactatacaaaaggcctgcagcaaacgacgaaaactacgct<br/> gcatcagtttaataagctgatccatggtagcgtgtagaggcatcaataaaacgaaaggctcagtcgaaagactggg<br/> ccttctgtttatctgttgttgcggtgaacgctctctgagtaggacaaatccgcccttagacctaggggcgttcggctgc<br/> ggcgagcgggtatcagctcactcaaggcggtaatacggttatccacagaatcaggggataacgcaggaaagaacatgtg<br/> agcaaaaggccagcaaaaggccaggaaccgtaaaaaggcgggatctcgaccgatgcccttgagagccttcaaccagt<br/> cagctcctccgggtggcgcggggcatgactaacatgagaattacaacttatacgtatggggctgacttcaggtgctacat<br/> ttgaagagataaattgcactgaaatctagaatattttatctgattaataagatgatcttcttgagatcgttttggtctgcgctaa<br/> tctcttgcctgaaaaacgaaaaaccgcttgcagggcgggttttcgaagggtctctgagctaccaactcttgaaccgaggt<br/> aactggcttggaggagcgcagtcacaaaaactgtcctttagtttagccttaaccggcgcgatgactcaagactaactcctc<br/> taaatcaattaccagtggctgctgccagtgggtctttgcatgcttccgggttgactcaagacgatagtaccggataag<br/> gcgcagcggctggactgaacggggggttcgtgcatacagtcagcttgagcgaactgcctaccggactgagtgca<br/> ggcgtggaatgagacaaacgcggccataacagcggaatgacaccggtaaacgaaaggcaggaaacaggagagcgc<br/> acgagggagccgccaggggaaacgcctggtatctttatagctcctgctcgggttcgccaccactgattgagcgtcagattc<br/> gtgatcctgtcagggggcgagcctatggaaaacggcttgcggcgcctctcacttccctgttaagtatcttctgg<br/> catctccaggaaatctccgccccgttcgtaagccattccgctcggcagtcgaacgaccgagcgtagcagtcagtg<br/> agcgaggaaagcggaaatatacctgtatcacatattctgctgacgcaccggcagccttttctcctgccacatgaagcact<br/> tactgacacctcatcagtgccaacatagtaagccagtatacactccgctagcgtgatgctcggcggtgcttttgccgtt<br/> acgcaccacccgtcagtagctgaacaggaggacagctgatagaacagaagccactggagcacctcaaaaacacc<br/> atcatacactaaatcagtaagttggcagcatcaccgacgcactttgcgccgaataaatacctgtgacgggaagatcacttcg<br/> cagaataaataaatcctggtg</p> |
|--------------------------------------------------------------------------------------------------------------------------------------------------------------------------------------------------------------------------------------------------------------------------------------------------------------------------------------------------------------------------------------------------------------------------------------------------------------------------------------------------------------------------------------------------------------------------------------------------------------------------------------------------------------------------------------------------------------------------------------------------------------------------------------------------------------------------------------------------------------------------------------------------------------------------------------------------------------------------------------------------------------------------------------------------------------------------------------------------------------------------------------------------------------------------------------------------------------------------------------------------------------------------------------------------------------------------------------------------------------------------------------------------------------------------------------------------------------------------------------------------------------------------------------------------------------------------------------------------------------------------------------------------------------------------------------------------------------------------------------------------------------------------------------------------------------------------------------------------------------------------------------------------------------------------------------------------------------------------------------------------------------------------------------------------------------------------------------------------------------------------------------------------------------------------------------------------------------------------------------------------------------------------------------------------------------------------------------------------------------------------------------------------------------------------------------------------------------------------------------------------------------------------------------------------------------------------------------------------------------------------------------------------------------------------------------------------------------------------------------------------------------------------------------------------------------------------------------------------------------------------------------------------------------------------------------------------------------------------------------------------------------------------------------|

**Table SI:** Vectors used in this work. Location of antibiotic resistance marker shown in red, UP element in blue (UPD-01-48 as shown), *rrn* core (*rrnD* as shown) in purple, reporter gene (GFP as shown) shown in green, and origin of replication shown in gold.



**Table SII**

| <b>Primer Name</b>                         | <b>Sequence</b>                                               | <b>Description</b>                    |
|--------------------------------------------|---------------------------------------------------------------|---------------------------------------|
| MFH-24-UPA-F                               | cccacacatgcataaaaaaacagaaaaatatttgaaaaaagacgtcttcg<br>ctc     | Mix and match<br>UP Element<br>Design |
| MFH-23-UPA-R                               | gagcgaagacgtcttttttcaaaatattttctgtttttatgcatgtgtggg           |                                       |
| MFH-22-UPB-F                               | cccacacatgcatggaaaatttttttaaaaaagagacgtcttcgctc               |                                       |
| MFH-21-UPB-R                               | gagcgaagacgtctcttttttaaaaaaatttccatgcatgtgtggg                |                                       |
| MFH-20-UPC-F                               | cccacacatgcatagaaaaatatttgaaaaaagagacgtcttcgctc               |                                       |
| MFH-19-UPC-R                               | gagcgaagacgtctcttttttcaaaatattttctatgcatgtgtggg               |                                       |
| MFH-18-UPD-F                               | cccacacatgcatggaaaatttttttaaaaaagacgtcttcgctc                 |                                       |
| MFH-17-UPD-R                               | gagcgaagacgtcttttttaaaaaaatttccatgcatgtgtggg                  |                                       |
| MFH-14- rrnd<br>EcoRi-end3'                | TTGTGCAAAAATTGGGATCCCTATAATGCGC<br>CTCCGGACGTCTTCGCTC         |                                       |
| MFH-13-5'end-<br>NsiI-UPD-primer<br>(rrnd) | CCCACACATGCATGGAAAATTTTTTTTAAAAA<br>AATTGTGCAAAAATTGGGATCCCTA |                                       |
| MFH-12-5'end-<br>NsiI-UPE-primer<br>(rrnd) | CCCACACATGCATAGAAAATATTTTGAAAAA<br>AATTGTGCAAAAATTGGGATCCCTA  |                                       |

|                                      |                                                            |                                       |
|--------------------------------------|------------------------------------------------------------|---------------------------------------|
| MFH027-<br>GFPprimerUpstream         | ttgcatcaccttcaccctctccaactga                               | Sequencing primer                     |
| MFH028-rrnd<br>EcoRI correct         | gagcgaagaattcccgagggcgcattatagggatccaatttttgcaaaa          | Library UPD-01-48                     |
| MFH0029-NsiI-<br>UPDAatIIrrnd        | cccacacatgcatggaaaatttttttaaaaaannnnnnttgcaaaaaattgggat    |                                       |
| MFH115-<br>5'NsiIendfullconseqrrnd   | cccacaatgcatnnaaawwtwttnnnaannnttgcaaaaaattgggatcc         | Libraries PR03 and CR04               |
| MFH116-<br>3'endrrnd-EcoRI           | gagcgaagaattccggagggcgcattatagggatccaatttttgcaaaa          |                                       |
| MFH117-<br>5'NsiIend30Nrrnd          | cacaatgcatnnnnnnnnnnnnnnnnnnnnnnnnnnnnnttgcaaaaaattgggatc  |                                       |
| MFH215-29-48<br>distal 10N library F | cccacacatgcatggaaaatnnnnnnnnnnaaaatcgtgcttgcaaaaaattgggatc | Library UPD48-Dist and UPD48-Far Dist |
| MFH216-29-48<br>library R            | ttcgtcgaattcccgagggcgcattatagggatccaatttttgcaaaaagc        |                                       |
| MFH217-Far distal<br>7N              | cccacacatgcatnnnnnnnttttttaaaaaatcgtgcttgcaaaaaattgggatc   |                                       |
| MFH224-<br>PROX_29-48                | cccacacatgcatggaaaatttttttaannnnnnnnnttgcaaaaaattgggatc    | Library UPD48-Prox                    |
| MFH-225-<br>REV_LIBPROX_29-48        | ttcgtcgaattcccgagggcgcattatagggatccaatttttgcaaaa           |                                       |
| MFH226-p1_2x-<br>29-48-rrnd          | acacatgcatggaaaatttttttaaaaaatcgtgcggaaaatttttttaaaaaatc   | Rational tandem UP element design     |

|                               |                                                               |
|-------------------------------|---------------------------------------------------------------|
| MFH227-p2_2x-29-48-rrnd       | gggatcccaatTTTTgcacaagcacgattTTTTtaaaaaaatttccgcacg           |
| MFH228-p3_29-48rrnd           | tgtgcaaaaaattgggatccctataatgcgcctccggaattcttcg                |
| MFH229-Amplify 3' end         | cgaagaattccggaggcg                                            |
| MFH230-Amplify 5'end          | acacatgcatggaaaattTTTTtaaa                                    |
| MFH231-p1_29-1_29-48-rrnd     | acacatgcatggaaaattTTTTtaaaaaatagcgggaaaattTTTTtaaaa<br>aatc   |
| MFH232-p2_29-1_29-48-rrnd     | gggatcccaatTTTTgcacaagcacgattTTTTtaaaaaaatttccccgct           |
| MFH233-p1-UPD2948             | acacatgcatggaaaattTTTTtaaaaaaatgcatggaaaattTTTTtaaaaa<br>aatc |
| MFH234-p2-UPD2948             | gggatcccaatTTTTgcacaagcacgattTTTTtaaaaaaatttccatgcattt<br>ttt |
| MFH235-p1_115-48_29-48        | acacatgcatgaaaatTTTTtaaaaggaggaaaattTTTTtaaaaaaatcg           |
| MFH236-p2_115-48_29-48        | gggatcccaatTTTTgcacaagcacgattTTTTtaaaaaaatttccctctttta<br>aaa |
| MFH237-5'amplify_115-48_29-48 | acacatgcatgaaaatTTTTtaaaaggagg                                |
| MFH238-p1_115-89_29-48        | acacatgcatgaaaattTTTTtaggaaaatgggaaaattTTTTtaaaaaaatc         |

|                             |                                                                                       |                                                                   |
|-----------------------------|---------------------------------------------------------------------------------------|-------------------------------------------------------------------|
| MFH239-p2_115-89_29-48      | gggatcccaatTTTTgcacaagcacgattTTTTtaaaaaaatttcccatttcc<br>taa                          |                                                                   |
| MFH240-amplify_115-89_29-48 | acacatgcattgaaaatTTTTtagga                                                            | Libraries<br>Tandem<br>Proximal (TP)<br>and Tandem<br>Distal (TD) |
| MFH256-tandemproxlib        | cacacatgcatggaaaatTTTTtaannnnnnnnnggaaaatTTTTtaa<br>aaaaatcgtgcttgcaaaaaattgggatccc   |                                                                   |
| MFH256-AmplifytandemUP      | gagcgaagaattcccgagcgcattatagggatcccaatTTTTgcacaa                                      |                                                                   |
| MFH258-tandemDistalUP       | cacacatgcatnnnnnnnnntTTTTaaaaaatcgtgcggaaaatTTTTta<br>aaaaatcgtgcttgcaaaaaattgggatccc |                                                                   |
| KP103_F1_hcaT_q<br>PCR      | TGGAGCGTCTGGCTTAAAGG                                                                  | qPCR primers<br>for<br>housekeeping<br>gene, hcaT                 |
| KP104_R1_hcaT_q<br>PCR      | AGAGAAGTGTCAGCAGTGCC                                                                  |                                                                   |
| KP111_F1_GFP_q<br>PCR       | ACCTGTCCACACAATCTGCC                                                                  | qPCR primers<br>for GFP                                           |
| KP112_F1_GFP_q<br>PCR       | GCAGCGTAGTTTTTCGTCGTT                                                                 |                                                                   |
| KP134_GFP_UP_i<br>nto_pACYC | aagcaaattcgaccgggtcgGCGAAACGATCCTCATCC                                                | Insertion into<br>pACYC<br>background                             |
| KP135_GFP_UP_i<br>nto_pACYC | AGGGCATCGGTCGAGATCCCgccttttacggtcctgg                                                 |                                                                   |
| KP136_pACYC_F               | GGGATCTCGACCGATGCC                                                                    |                                                                   |
| KP137_pACYC_R               | cgaccgggtcgaattgc                                                                     |                                                                   |

|                                     |                                                                 |                                                  |
|-------------------------------------|-----------------------------------------------------------------|--------------------------------------------------|
| KP142_AmpR_int<br>o_UPpZE           | ATGAGTATTCAACATTTCCGTG                                          | Substitution of<br>$\beta$ -lactamase for<br>GFP |
| KP133_AmpR_int<br>o_UPpZE           | gtctgacagttaccaatgc                                             |                                                  |
| KP079_inv_PCR_r<br>ev               | GAATTCATTAAAGAGGAGAAAGGTACC                                     | Variable rRNA<br>core promoters                  |
| KP080_29-48-and-<br>tp24-rnA-invPCR | TAgggagttattccggccTGACAAGCACGATTTTTTTA<br>AAAAAAATTTTCC         |                                                  |
| KP081_29-48-and-<br>tp24-rnH-invPCR | tagggagtcggctcaggaagACAAGCACGATTTTTTTAA<br>AAAAAATTTTCC         |                                                  |
| KP082_rnAcoreon<br>ly-invPCR        | TAgggagttattccggccTGACAAatgCATgccATCGAT                         |                                                  |
| KP083_rnHcoreon<br>ly-invPCR        | tagggagtcggctcaggaagACAAatgCATgccATCGAT                         |                                                  |
| KP084_rnA_core_<br>insert_fwd       | CAggccggaataactcccTATAAtgcgccaccagaattcattaaga<br>ggagaaaggtacc |                                                  |
| KP085_rnH_core_<br>insert_fwd       | cttctgagccgactccctataatgcgcctccagaattcattaagaggagaa<br>aggtacc  |                                                  |
| KP086_rnA_core_<br>insert_rev       | ggtacctttctcctttaatgaattctggtggcgcaTTATAgggagttatt<br>ccggccTG  |                                                  |
| KP087_rnH_core_<br>insert_rev       | ggtacctttctcctttaatgaattctggaggcgccattatagggagtcggctc<br>aggaag |                                                  |

**Table SII:** Primers used in this work

**Table SIII**

| Region    | Sequence       | Relative Activity | UP element present in   |
|-----------|----------------|-------------------|-------------------------|
| Proximal1 | aaaaaaaga      | 170               | UPA, UPB, UPC, UPD, UPE |
| Proximal2 | aaaaaaaca      | 160               | UPA                     |
| Distal1   | agaaaaatattttg | 16                | UPA, UPC, UPE           |
| Distal2   | ggaaaattttttt  | 16                | UPB, UPD                |

**Table SIII:** Proximal and distal UP element regions used in rational design. Regions were identified through RNA polymerase binding assays. Relative activity determined elsewhere (Estrem et al. 1999) is a measure of  $\beta$ -galactosidase expression.

**Table SIV**

| Construct            | Sequence                                                |
|----------------------|---------------------------------------------------------|
| rrnD                 | TTGTGCAAAAAATTGGGATCCCTATAATGCGCCTCCG                   |
| UPA                  | AAAAAAACAAGAAAAATATTTTGAAAAAAGA                         |
| UPB                  | GGAAAATTTTTTTTAAAAAAGAGACGTC                            |
| UPC                  | AGAAAAATATTTTGAAAAAAGAGACGTC                            |
| UPD                  | GGAAAATTTTTTTTAAAAAAGACGTC                              |
| UPE (previously UP1) | AGAAAAATATTTTGAAAAAAGACTGC                              |
| UPD-01-48            | GGAAAATTTTTTTTAAAAAATCGTGC                              |
| UPD48-Prox-18        | GGAAAATTTTTTTTAAAGGGGGGACCC                             |
| UPD48-Dist-66        | GGAAAATCGGGTTGCTAAAAATCGTGC                             |
| UPD48-Far dist-62    | CATCATCTTTTTTAAAAAATCGTGC                               |
| TP-24                | AGACTAAGTGTTTTAAAAAATCGTGCGGAAAATTTTT<br>TTAAAAAATCGTGC |

**Table SIV:** Sequences of selected UP elements.

**Table SV**

| Tandem Up Element Name | Sequence                                             | Primer Source 1 | Primer Source 2 |
|------------------------|------------------------------------------------------|-----------------|-----------------|
| 226                    | ggaaaatTTTTTAAAAAATcgtgcggaaaatTTTTT<br>AAAAAATcgtgc | MF226           | Mf227           |
| 231                    | ggaaaatTTTTTAAAAAATagcgggaaaatTTTTT<br>AAAAAATcgtgc  | MF231           | MF232           |
| 235                    | taaaatTTTTTAAAAGAGGAAAATTTTTTAAAA<br>AATcgtgc        | MF235           | MF236           |
| 238                    | tgaaaatTTTTTAGGAAAATGGAAAATTTTTTAAAA<br>AATcgtgc     | MF238           | MF239           |

**Table SV:** Rational tandem library. Combinations of UP element sequences used in construction of mix-and-match rational tandem repeat library.
